# Supplementary material
Source: PubMed Central journal article supplement (PMC6774751)
Supplement: AnnalsATS.201902-112OC_iyer_data_supplement.pdf [file AnnalsATS.201902-112OC_iyer_data_supplement.pdf]

## **Online Data Supplement**

### **A Formative Evaluation of Patient and Family Caregiver Perspectives on Early Palliative Care in COPD across Disease Severity**

Anand S. Iyer, MD, MSPH; J. Nicholas Dionne-Odom, PhD, RN; Stephanie M. Ford; Sheri L. Crump Tims, BSN, RN, CHPN; Elizabeth D. Sockwell, CRNP; Nataliya V. Ivankova, PhD, MPH; Cynthia J. Brown, MD, MSPH; Rodney O. Tucker, MD; Mark T. Dransfield, MD; and Marie A. Bakitas, DNSc, CRNP

**Table E1. Consolidated Criteria for Reporting Qualitative Studies (COREQ): 32-item Checklist<sup>60</sup>**

| No.                                            | Item                                     | Guide Questions/Description                                                                                                                              | Manuscript Page |
|------------------------------------------------|------------------------------------------|----------------------------------------------------------------------------------------------------------------------------------------------------------|-----------------|
| <b>Domain 1: Research Team and Reflexivity</b> |                                          |                                                                                                                                                          |                 |
| <i><b>Personal Characteristics</b></i>         |                                          |                                                                                                                                                          |                 |
| 1.                                             | Interviewer/facilitator                  | Which author/s conducted the interview or focus group?                                                                                                   | 8               |
| 2.                                             | Credentials                              | What were the researcher's credentials? E.g. PhD, MD                                                                                                     | 8, Title Page   |
| 3.                                             | Occupation                               | What was their occupation at the time of the study?                                                                                                      | 8, Title Page   |
| 4.                                             | Gender                                   | Was the researcher male or female?                                                                                                                       | 8               |
| 5.                                             | Experience and training                  | What experience or training did the researcher have?                                                                                                     | 8               |
| <i><b>Relationship with Participants</b></i>   |                                          |                                                                                                                                                          |                 |
| 6.                                             | Relationship established                 | Was a relationship established prior to study commencement?                                                                                              | 8               |
| 7.                                             | Participant knowledge of the interviewer | What did the participants know about the researcher? e.g. personal goals, reasons for doing the research                                                 | 8               |
| 8.                                             | Interview characteristics                | What characteristics were reported about the interviewer/facilitator? e.g. Bias, assumptions, reasons and interests in the research topic                | 8               |
| <b>Domain 2: Study Design</b>                  |                                          |                                                                                                                                                          |                 |
| <i><b>Theoretical Framework</b></i>            |                                          |                                                                                                                                                          |                 |
| 9.                                             | Methodological orientation Theory        | What methodological orientation was stated to underpin the study? e.g. grounded theory, discourse analysis, ethnography, phenomenology, content analysis | 8, 10           |
| <i><b>Participant Selection</b></i>            |                                          |                                                                                                                                                          |                 |
| 10.                                            | Sampling                                 | How were participants selected? e.g. purposive, convenience, consecutive, snowball                                                                       | 7               |
| 11.                                            | Method of approach                       | How were participants approached? e.g. face-to-face, telephone, mail, email                                                                              | 7               |
| 12.                                            | Sample size                              | How many participants were in the study?                                                                                                                 | 11              |

|                                        |                                |                                                                                                                                   |                        |
|----------------------------------------|--------------------------------|-----------------------------------------------------------------------------------------------------------------------------------|------------------------|
| 13.                                    | Non-participation              | How many people refused to participate or dropped out? Reasons?                                                                   | 11                     |
| <b>Setting</b>                         |                                |                                                                                                                                   |                        |
| 14.                                    | Setting of data collection     | Where was the data collected? e.g. home, clinic, workplace                                                                        | 8                      |
| 15.                                    | Presence of non-participants   | Was anyone else present besides the participants and researchers?                                                                 | 8                      |
| 16.                                    | Description of sample          | What are the important characteristics of the sample? e.g. demographic data, date                                                 | 11                     |
| <b>Data Collection</b>                 |                                |                                                                                                                                   |                        |
| 17.                                    | Interview guide                | Were questions, prompts, guides provided by the authors? Was it pilot tested?                                                     | 8, Table E2            |
| 18.                                    | Repeat interviews              | Were repeat interviews carried out? If yes, how many?                                                                             | No                     |
| 19.                                    | Audio/visual recording         | Did the research use audio or visual recording to collect the data?                                                               | 8                      |
| 20.                                    | Field notes                    | Were field notes made during and/or after the interview or focus group?                                                           | No                     |
| 21.                                    | Duration                       | What was the duration of the interviews or focus group?                                                                           | 8                      |
| 22.                                    | Data saturation                | Was data saturation discussed?                                                                                                    | 10-11                  |
| 23.                                    | Transcripts returned           | Were transcripts returned to participants for comment and/or correction?                                                          | 10                     |
| <b>Domain 3: Analysis and Findings</b> |                                |                                                                                                                                   |                        |
| <b>Data analysis</b>                   |                                |                                                                                                                                   |                        |
| 24.                                    | Number of data coders          | How many data coders coded the data?                                                                                              | 10                     |
| 25.                                    | Description of the coding tree | Did authors provide a description of the coding tree?                                                                             | 10                     |
| 26.                                    | Derivation of themes           | Were themes identified in advance or derived from the data?                                                                       | 10                     |
| 27.                                    | Software                       | What software, if applicable, was used to manage the data?                                                                        | 10                     |
| 28.                                    | Participant checking           | Were participant quotations presented to illustrate the themes / findings? Was each quotation identified? e.g. participant number | 11-13, Tables, Figures |
| <b>Reporting</b>                       |                                |                                                                                                                                   |                        |

|     |                              |                                                                                                                                   |                        |
|-----|------------------------------|-----------------------------------------------------------------------------------------------------------------------------------|------------------------|
| 29. | Quotations presented         | Were participant quotations presented to illustrate the themes / findings? Was each quotation identified? e.g. participant number | 11-13, Tables, Figures |
| 30. | Data and findings consistent | Was there consistency between the data presented and the findings?                                                                | 11-13, Tables, Figures |
| 31. | Clarity of major themes      | Were major themes clearly presented in the findings?                                                                              | 11-13, Tables, Figures |
| 32. | Clarity of minor themes      | Is there a description of diverse cases or discussion of minor themes?                                                            | 11-13, Figures         |

**Table E2. Sample Interview Guide Questions**

What does palliative care mean to you?

What does hospice mean to you?

*(After defining early palliative care)* Now that you have an idea of early palliative care, what is your reaction to hearing about this program?

What are your biggest needs living with COPD? What are your biggest challenges?

What are the most challenging symptoms you struggle with? Why are these symptoms challenging? How has your life changed due to symptoms?

How could early palliative care help you or your loved one living with COPD? Are there any particular aspects of early palliative care that could be helpful?

When do you think palliative care should be started in COPD?
